# Supplementary material
Source: Springer Nature journal article supplement (https://www.springermedizin.de/resource/supplementary/12887_2005_99_MOESM10_ESM.pdf/9477266)

### Haemoglobin <7 g/dL

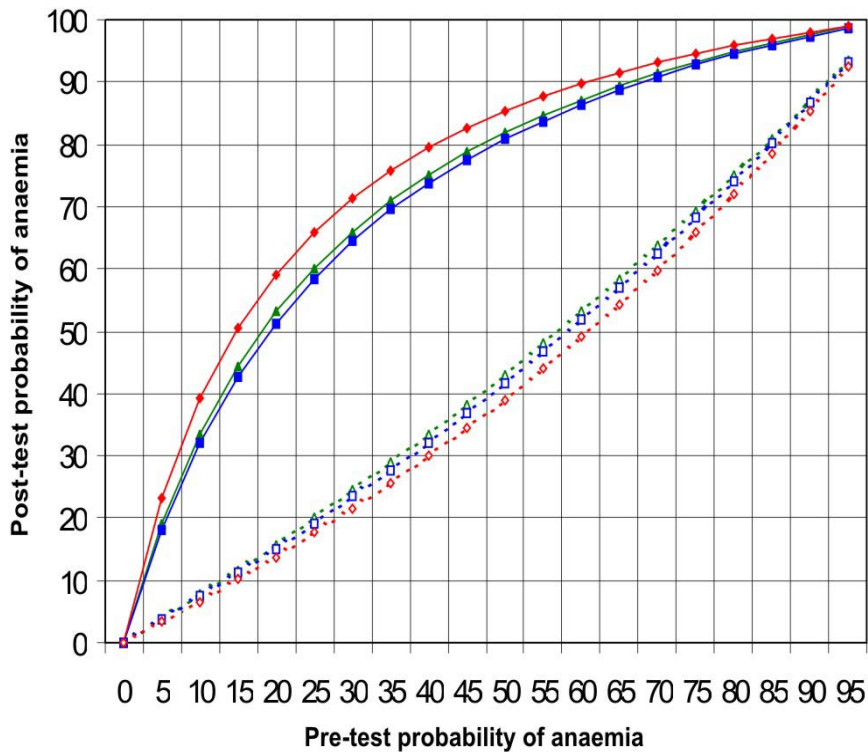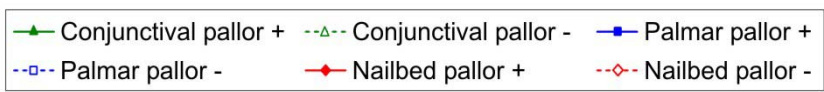

Supplement: MOESM10 [file 9477266]
